# Supplementary material for: Executive Functioning and Non-Verbal Intelligence as Predictors of Bullying in Early Elementary School
Source: Springer Nature journal article supplement (doi:10.1007/s10802-013-9832-y), 2013-12-14
Supplement: MOESM1 [file 10802_2013_9832_MOESM1_ESM.docx]

**Supplementary Figure**

**Flowchart of the sampling procedure**
