# Supplementary material for: Executive Functioning and Non-Verbal Intelligence as Predictors of Bullying in Early Elementary School
Source: Springer Nature journal article supplement (doi:10.1007/s10802-013-9832-y), 2013-12-14
Supplement: MOESM3 [file 10802_2013_9832_MOESM3_ESM.docx]

**Supplementary Table 2. Child executive functioning and victimization in early elementary school (*n*=1377)**

|  | **Victimization score** | | | |
| --- | --- | --- | --- | --- |
| **Univariate model** | | **Adjusted for covariates1** | |
| **Executive functioning** | *B* (*95% CI*) | *p*-value | *B* (*95% CI*) | *p*-value |
| **Domains of executive functioning (per *SD*)** |  |  |  |  |
| Inhibition problem score | **0.016** (0.004-0.027) | 0.007 | **0.015** (0.004-0.025) | 0.009 |
| Shifting problem score | -0.003 (-0.013-0.007) | 0.53 | -0.005 (-0.013-0.003) | 0.20 |
| Emotional control problem score | 0.005 (-0.006-0.015) | 0.38 | 0.004 (-0.007-0.014) | 0.49 |
| Working memory problem score | 0.008 (-0.003-0.018) | 0.16 | 0.005 (-0.007-0.016) | 0.42 |
| Planning/organization problem score | 0.006 (-0.008-0.020) | 0.36 | 0.003 (-0.009-0.014) | 0.63 |
| **Global scores** |  |  |  |  |
| Global executive composite (per *SD*) | 0.010 (-0.001-0.021) | 0.07 | 0.007 (-0.004-0.018) | 0.23 |
| Child IQ score | **-0.002** (-0.003- -0.001) | <0.001 | **-0.001** (-0.002- -0.001) | <0.001 |

*Note.*

*n*=1377. Victimization is self-reported.

Presented coefficient: unstandardized *B* derived from multilevel linear regression analyses. Victimization scale was transformed using square root transformation.

*Adjusted for: child age, gender and national origin; maternal age, national origin, parity, education, income, marital status, depression symptoms and parenting stress.
